# Supplementary material
Source: Springer Nature journal article supplement (https://www.springermedizin.de/resource/supplementary/13063_2012_1401_MOESM3_ESM.pdf/9619954)
Supplement: MOESM3 [file 9619954]

187 patients were assessed for eligibility

65 out of regular operating hours  
6 expected survival <6 months  
7 patients did not provide consent  
2 pathological fractures  
2 hemodialysis  
3 technical problems  
2 multiresistant bacterial infection prohibiting to start the monitoring in the preoperative area

100 patients underwent randomization

50 patients assigned to routine fluid treatment

50 patients assigned to GDHT

50 patients were included in the intention-to-treat analysis

1 patient included twice

49 patients were included in the intention-to-treat analysis
